# Supplementary material for: Genome Mining of α-Pyrone Natural Products from Ascidian-Derived Fungus Amphichorda felina SYSU-MS7908
Source: MDPI journal article supplement (doi:10.3390/md20050294), 2022-04-27

# Genome Mining of $\alpha$ -pyrone Natural Products from the Ascidian-Derived Fungus *Amphichorda felina* SYSU-MS7908

Siwen Yuan <sup>1,†</sup>, Litong Chen <sup>1,†</sup>, Qilin Wu <sup>1</sup>, Minghua Jiang <sup>1</sup>, HengGuo <sup>1</sup>, Zhibo Hu <sup>1</sup>, Senhua Chen <sup>1,2</sup>,  
Lan Liu <sup>1,2,3,4</sup> and Zhizeng Gao <sup>1,2,3,4</sup>

1 School of Marine Sciences, Sun Yat-sen University, Guangzhou 510006, China;

2 Southern Laboratory of Ocean Science and Engineering (Guangdong, Zhuhai), Zhuhai 519000, China

3 Southern Marine Science and Engineering Guangdong Laboratory (Zhuhai), Zhuhai 519000, China

4 Pearl River Estuary Marine Ecosystem Research Station, Ministry of Education, Zhuhai 519082, China

✉ Correspondence: gaozhizeng@mail.sysu.edu.cn

† These authors contributed equally to this work.

## Contents

|                                                                                                     |    |
|-----------------------------------------------------------------------------------------------------|----|
| <b>Table S1</b> Primers used in this study .....                                                    | 3  |
| <b>Table S2</b> Plasmids constructed in this study .....                                            | 4  |
| <b>Table S3</b> <i>A. oryzae</i> transformants constructed in this study .....                      | 5  |
| <b>Table S4</b> <sup>1</sup> H NMR and <sup>13</sup> C NMR data of udagawanone A ( <b>3</b> ) ..... | 5  |
| <b>Figure S1</b> The antiSMASH (fungal version) result of <i>Amphichordafelina</i> SYSU-MS7908 .... | 5  |
| <b>Figure S2</b> Amino acid sequence alignment of AmpB with Sol1 .....                              | 6  |
| <b>Figure S3</b> Amino acid sequence alignment of AmpC with Sol2 .....                              | 6  |
| <b>Figure S4</b> HRESIMS spectrum of Amphichopyrone A ( <b>1</b> ) .....                            | 7  |
| <b>Figure S5</b> The IR spectrum of Amphichopyrone A ( <b>1</b> ) .....                             | 7  |
| <b>Figure S6</b> The UV spectrum of Amphichopyrone A ( <b>1</b> ) .....                             | 8  |
| <b>Figure S7</b> HRESIMS spectrum for Amphichopyrone B ( <b>2</b> ) .....                           | 8  |
| <b>Figure S8</b> The IR spectrum of Amphichopyrone B ( <b>2</b> ) .....                             | 9  |
| <b>Figure S9</b> The UV spectrum of Amphichopyrone B ( <b>2</b> ) .....                             | 9  |
| <b>Figure S10</b> PCR analysis for the AO- <i>ampABCDEFGHIJ</i> construct .....                     | 9  |
| <b>NMR spectra</b> .....                                                                            | 10 |

**Table S1.** Primers used in this study

| Primer               | Sequence (5' to 3')                                        |
|----------------------|------------------------------------------------------------|
| pUSA_A-F             | CTCCGAATTCGAGCTC <b>GGTACC</b> CTGAGTAAAGCATCTCCAGCTC      |
| pUSA_A-R             | CTACTACAGATCCCCG <b>GGTACC</b> GGTATATTTTCTCTCTGGCATGC     |
| pTAex3_B-F           | AGCTCCGAATTCGAGCTC <b>GGTACC</b> ATCGTCAGTCGTCAAAGCGAAG    |
| pTAex3_B-R           | CACGAGCTACTACAGATC <b>CCCGGG</b> CAATCATCGAAAGCTTTTTGGCTCA |
| pUSA_C-F             | CAAGCTGAATTCGAGCTC <b>GGTACC</b> TACTGCCTCAAGATTCGCTGGT    |
| pUSA_C-R             | CACGAGCTACTACAGATC <b>CCCGGG</b> CTGCGAGCCGATGTGACCCC      |
| pUSA_D-F             | CTCCGAATTCGAGCTC <b>GGTACC</b> ACTCGCCAATCTGCCAAATATTCAT   |
| pUSA_D-R             | CACGAGCTACTACAGATC <b>CCCGGG</b> CTCACAAGCACTGCTGCG        |
| pTAex3_E-F           | AGCTCCGAATTCGAGCTC <b>GGTACC</b> GCTGACCATTGCTTCAACACC     |
| pTAex3_E-R           | CACGAGCTACTACAGATC <b>CCCGGG</b> ATGCGAGACTCCCAAATAGTGAG   |
| pTAex3_F-F           | AGCTCCGAATTCGAGCTC <b>GGTACC</b> GCAGCTAAGCCGTGTCCAG       |
| pTAex3_F-R           | CACGAGCTACTACAGATC <b>CCCGGG</b> TACAGGTTCTCAAACAGCCAAGGCA |
| pTAex3_G-F           | AGCTCCGAATTCGAGCTC <b>GGTACC</b> ACGATGTACTAAGATCCGGCCG    |
| pTAex3_G-R           | CACGAGCTACTACAGATC <b>CCCGGG</b> CATACGTGATATCTGTCTCGGTGG  |
| pTAex3_H-F           | CTCCGAATTCGAGCTC <b>GGTACC</b> TTAGCCTTATCCCTGGGTGC        |
| pTAex3_H-R           | CTACTACAGATCCCCG <b>GGTACC</b> ATGAATGTGGGGATTGAGGTT       |
| pTAex3_I-F           | CTCCGAATTCGAGCTC <b>GGTACC</b> ATTACAAGCAAAACAGGCAACCT     |
| pTAex3_I-R           | CTACTACAGATCCCCG <b>GGTACC</b> GCACCCAGGGATAAGGCTGA        |
| pTAex3_J-F           | CAAGCTGAATTCGAGCTC <b>GGTACC</b> GCTGAGCAGGCTGAGCAGGG      |
| pTAex3_J-R           | CACGAGCTACTACAGATC <b>CCCGGG</b> CGACTCTAGGAGTTCCTGTTTAGGT |
| Infu_pAdeA_SpeI_F    | TAGAGGATCT <b>ACTAGT</b> CAAGAGCAGAATGTGAACG               |
| Infu_pAdeA_SpeI_R    | AATCCATATG <b>ACTAGT</b> GATACATGAGCTTCGGTG                |
| Infu-pBARI-HindIII-F | TGACCATGATTACGCC <b>AAGCTT</b> CAAGAGCAGAATGTGAACG         |
| Infu-pBARI-HindIII-R | CGACCTGCAGGCATGC <b>AAGCTT</b> GTAAGATACATGAGCTTCGG        |
| Infu-pPTRI-HindIII-F | TGACCATGATTACGCC <b>AAGCTT</b> CGACTCCAATCTTCAAGAGC        |
| Infu-pPTRI-HindIII-R | GCAGGCATGC <b>AAGCTT</b> GTAAGATACATGAGCTTCGG              |
| Infu-linker-F1       | GCTCGCGAGCGCGTTCCACTGCATCATCAGTCTAG                        |
| Infu-linker-R1       | AACGCGCTCGCGAGCAAGTACCATACAGTACCGCG                        |
| Infu-linker-F2       | TCGCGTGCGCGTTTACCCATCATGGTGTTTTGATC                        |
| Infu-linker-R2       | TAAACGCGCACGCGACATTAATCCGGATCCTTTCC                        |
| Infu-linker-pUSA-F   | GCTCGCGAGCGCGTTTCGATATCATGGTGTTTTGATC                      |
| Infu-linker-pUSA-R   | AACGCGCTCGCGAGCCTTTTCCTATAATAGACTAGCGTG                    |
| iNOS_F               | GGCAGCCTGTGAGACCTTTG                                       |
| iNOS_R               | GCATTGGAAGTGAAGCGTTTC                                      |
| TNF- $\alpha$ F      | TTCTGTCTACTGAACTTCGGGGTGATCGGTCC                           |
| TNF- $\alpha$ R      | GTATGAGATAGCAAATCGGCTGACGGTGTGGG                           |
| IL-6F                | TCCAGTTGCCTTCTTGGA                                         |
| IL-6R                | GTGTAATTAAGCCTCCGACTTG                                     |
| COX-2F               | TGAGTACCGCAAACGCTTCTC                                      |

|                |                           |
|----------------|---------------------------|
| COX-2R         | TGGACGAGGTTTTTCCACCAG     |
| IL-1 $\beta$ F | GAAAGACGGCACACCCACCCT     |
| IL-1 $\beta$ R | GCTCTGCTTGTGAGGTGCTGATGTA |
| GAPDH-F        | CATGACCACAGTCCATGCCATCAC  |
| GAPDH-R        | TGAGGTCCACCACCCTGTTGCTGT  |

**Table S2.** Plasmids constructed in this study

| Plasmid                 | Inserts                   | Primer 1             | Primer 2             | PCR Template        | Vector                             |
|-------------------------|---------------------------|----------------------|----------------------|---------------------|------------------------------------|
| pUSA- <i>ampA</i>       | <i>ampA</i>               | pUSA_A-F             | pUSA_A-R             | gDNA                | pUSA digested with KpnI and SmaI   |
| pTAex3- <i>ampB</i>     | <i>ampB</i>               | pTAex3_B-F           | pTAex3_B-R           | gDNA                | pTAex3 digested with KpnI and SmaI |
| pUSA- <i>ampC</i>       | <i>ampC</i>               | pUSA_C-F             | pUSA_C-R             | gDNA                | pUSA digested with KpnI and SmaI   |
| pUSA- <i>ampD</i>       | <i>ampD</i>               | pUSA_D-F             | pUSA_D-R             | gDNA                |                                    |
| pTAex3- <i>ampE</i>     | <i>ampE</i>               | pTAex3_E-F           | pTAex3_E-R           | gDNA                | pTAex3 digested with KpnI and SmaI |
| pTAex3- <i>ampF</i>     | <i>ampF</i>               | pTAex3_F-F           | pTAex3_F-R           | gDNA                |                                    |
| pTAex3- <i>ampG</i>     | <i>ampG</i>               | pTAex3_G-F           | pTAex3_G-R           | gDNA                |                                    |
| pTAex3- <i>ampH</i>     | <i>ampH</i>               | pTAex3_H-F           | pTAex3_H-R           | gDNA                |                                    |
| pTAex3- <i>ampI</i>     | <i>ampI</i>               | pTAex3_I-F           | pTAex3_I-R           | gDNA                |                                    |
| pTAex3- <i>ampJ</i>     | <i>ampJ</i>               | pTAex3_J-F           | pTAex3_J-R           | gDNA                |                                    |
| pUSA- <i>ampA</i> +C    | <i>ampA</i> -TamyB        | pUSA_A-F             | Infu-linker- pUSA-R  | pUSA- <i>ampA</i>   | pUSA digested with KpnI and SmaI   |
|                         | PamyB- <i>ampC</i>        | Infu-linker- pUSA-F  | pUSA_C-R             | pUSA- <i>ampC</i>   |                                    |
| pAdeA- <i>ampE</i> +F   | PamyB- <i>ampE</i> -TamyB | Infu_pAdeA_SpeI_F    | Infu-linker-R1       | pTAex3- <i>ampE</i> | pAdeA digested with SpeI           |
|                         | PamyB- <i>ampF</i> -TamyB | Infu-linker-F1       | Infu_pAdeA_SpeI_R    | pTAex3- <i>ampF</i> |                                    |
| pPTRI- <i>ampD</i> +G   | PamyB- <i>ampD</i> -TamyB | Infu-pPTRI-HindIII-F | Infu-linker-R1       | pUSA- <i>ampD</i>   | pPTRI digested with HindIII        |
|                         | PamyB- <i>ampG</i> -TamyB | Infu-linker-F1       | Infu-pPTRI-HindIII-R | pTAex3- <i>ampG</i> |                                    |
| pBARI- <i>ampH</i> +I+J | PamyB- <i>ampH</i> -TamyB | Infu-pBARI-HindIII-F | Infu-linker-R1       | pTAex3- <i>ampH</i> | pBARI digested with HindIII        |
|                         | PamyB- <i>ampI</i> -TamyB | Infu-linker-F1       | Infu-linker-R2       | pTAex3- <i>ampI</i> |                                    |
|                         | PamyB- <i>ampJ</i> -TamyB | Infu-linker-F2       | Infu-pBARI-HindIII-R | pTAex3- <i>ampJ</i> |                                    |

**Table S3.** *A. oryzae* transformants constructed in this study

| Strains              | Host strain            | Plasmids used for transformation                              |
|----------------------|------------------------|---------------------------------------------------------------|
| <i>AmpB</i>          | <i>A. oryzae</i> NSAR1 | pTAex3- <i>ampB</i>                                           |
| <i>AmpBC</i>         | <i>A. oryzae</i> NSAR1 | pTAex3- <i>ampB</i> , pUSA- <i>ampC</i>                       |
| <i>AmpABCDEFG</i>    | <i>AmpABC</i>          | pAdeA- <i>ampE</i> + <i>F</i> , pPTRI- <i>ampD</i> + <i>G</i> |
| <i>AmpABCDEFGHIJ</i> | <i>AmpABCDEFG</i>      | pBARI- <i>ampH</i> + <i>I</i> + <i>J</i>                      |

**Table S4.** <sup>1</sup>H NMR and <sup>13</sup>C NMR data of udagawanone A (**3**) (400 and 100 MHz) (in CD<sub>3</sub>OD-*d*<sub>4</sub>, δ in ppm, *J* in Hz)

| No | δ <sub>H</sub> ( <i>J</i> in Hz) | δ <sub>C</sub> type   |
|----|----------------------------------|-----------------------|
| 2  |                                  | 166.9, C              |
| 3  |                                  | 111.5, C              |
| 4  |                                  | 172.2, C              |
| 5  |                                  | 110.5, C              |
| 6  |                                  | 155.6, C              |
| 7  | 6.45, dd (15.3, 1.4)             | 121.4, CH             |
| 8  | 6.67, dq (15.4, 6.9)             | 135.9, CH             |
| 9  | 1.95, dd (6.9, 1.2)              | 18.7, CH <sub>3</sub> |
| 10 | 4.53, s                          | 55.2, CH <sub>2</sub> |
| 11 | 1.99, s                          | 9.6, CH <sub>3</sub>  |
| 12 | 4.08, s                          | 62.4, CH <sub>3</sub> |

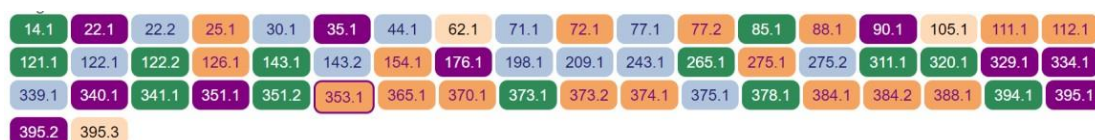**Figure S1.** The antiSMASH (fungal version) result of *Amphichorda felina* SYSU-MS7908

Sol1 MTSQYGTNGASADPEFIAIVGMGCRWPGGVRDASLWELKKNRSQYREFGDRHFRKGFHHFHNSEHFGTVATEGFLLAEDPRLFDHAFQIGSLEVEIMDPSQRKL 108  
 AmpB .....MTSTORDPHERVAIVGMGCRWPGGVRDSSHFWEFLDRDVGWKEFDDPRFSTRGFHHFNADRPQSVAMKGAFLAHEDARYFDHAFQGMTGLEVEIMDPSQRKL 103  
 Sol1 LEVYYEAFENSGEPWDSYSGSTTGTVGVGNFSNDHLITGGRTDHPRPYASVGTSTISLRNVNIFNLRGSPVITDACSMMYALHLAISAIRNGDCDPSAIVASNT 216  
 AmpB LEVAYEAIENAGETWDSYSGSRTGVGVGNFCLDHWMIQSRDWDNRPYPATGAGTBIANRISYIFNLQGPSLTVDTACSMMYALHLAVNAIRAGDCDPSAIVASNA 211  
 Sol1 IIDPSTXLMMTKGLVLSPTSTSHTFDSSADYARGEGFSALYLKRMSTAVGDGYPIRALVRGSALNANGRTGGITHPREGQEAIVIRKAYENAGNLPMDKDTTFECHO 324  
 AmpB VADRGVQVIALDKGALSASSRCHTFDARAEYARGEGYGAIYLKRPSLAIADLSPIRAMIRGTAVNSNGRTGGITRPSAKGQEVVIREAYRSAGDLPFSDTSYEECHO 319  
 Sol1 TGTVPDGPDIETIAIGNVFGSATTEPKFLVGSIKTNIGHTEPASAIAGIMKVVLALENGLIPPSIGIKKLNPKLDLKGGRINILTENTPWPDGRVRRASVNSFGYGG 432  
 AmpB TGTTVVGGDPIEVALAGLRVFAERSADDPMIGSVKSNVGHGEGASALASVMKVVLSLEKGAIPRVFNLETRNNIDFDGAKVQPVTEVTPWPEFGLORASINSFGYGG 427  
 Sol1 NGHCIIIDVRLTPDYKKRTANTSIGHINGHTNGHTNGHTN.....GHTNG.....HTNGHTNGHTNGAH....ASDG..HNGHHQNMNGNSASHMSEK 516  
 AmpB NAHCIIIDHMKNVLPDYVAPGVYQSLHERNGTTNGHANGTNGHKNGANHKNGTNGHIPASNGYANGFNGHTNGHANGTNGHPNGTNGHTNGHHNGGNGNPQTQ..... 530  
 Sol1 ADKVHYFYSKYPTLVKDFNAKPRRRVLIPFSAHNEASLDNITAISEAIKRENADVAYTLAAKRSRFMQRTFIVDSESPANGFAVKEVLASGDTOTARLGDFVFTG 624  
 AmpB .....HNHIIINSLOLAPSPNAATQQLVLLHSAHNENSLLENLNLASRVDKFPLABIAYTLASRRSFADRSSESIDKDNVTQSLTLATKVARAPLQTPNIGFIFTG 634  
 Sol1 GAQWHAMGADLFYAVFRTSLEYLDSIASLFTPSANKIEDI LARNDDPNIDHKPEVSQTVCTAVGIBLVDLLTYNNVRPSAAVHSSGIEAITYAAGRITAAQAIJA 732  
 AmpB GAQWHMGADLFYAVFRFTIQQLHVLGTLKAPSWTLQDILSGDQDAGIQTAEISGAVCTAVGVQLVDLLASWVRPSQVAGHSSGIEAAYASGRITAAQAIJS 742  
 Sol1 AYFRGQAVSNKSKGLMLAVGLGDKAEAFISLDSSVRIAAINSFSDYTLSSQESTIKDVAANKNEBKVFNRKLTGQAYHSHHMLALDEFNSTUSEGLDYVKSL 840  
 AmpB AYLRGQAVSRNKRKRAMLAVGLGSEEDVKLEQREAKVAAVNSPQSVTLSEPTAIDEISAMTADGVFNRLKLTGQAYHSHHMLAIGVEWAEILEEGIHHRDS 850  
 Sol1 GQAEPSQLATRPWMSYSPYSKSTENPPVSPSYWRANLESPPRFSEALNNMNLDPDPIDVLEIGPHPAKGPVGQISRSVDKSLPFPFTLNRTGNGISLLQLAGS 947  
 AmpB GQAEPSQLATRPWMSYSPYSKSTADFKAPASYWRANLESPPVSLFQAVARLVNDNEVPIHSLVEIGPHPAKGPVLDQILKAGGKTVAAYASTLVAGNGQSRQLQLAG 958  
 Sol1 LFSLNAEVDLTAVNAVDSANOLKLVHGTITATNLPPYQYAYGVPIYHESRFSKEFRGDIRVRHDLGSKLPQNAKLRPQWRNIRLKLDPWLNDHKLPLYPVFPAG 1055  
 AmpB LFSLNATIDLAAYNAVVDVST..RLEHGCTCTELPPYKVTYGGLYNHESRASKERYRVSRLRHDLGSKVVGNAKLRPQWRNIRLKMKVLPWLGDHRLVPAVFPAG 1064  
 Sol1 VIATVIEAASRIYNEQSEPLDITGYKLRNVFTSSAMRLPDDDFLEIITSLELADAANPKAPTWTATFISSSVAREAGTWTEHCSRVRVIAGTSAV..NEKMSTEMDA 1161  
 AmpB VIATVIEAASRIYNEQSEPLDITGYKLRNVFTSSAMRLPDDDFLEIITSLELADAANPKAPTWTATFISSSVAREAGTWTEHCSRVRVIAGTSAV..NEKMSTEMDA 1172  
 Sol1 RLTDLKAWYKFAEIGLGYGTFQPLSNIRADPSKGLAVQLALHTTROTVEGGESNYPLHPASLDGAVDLSLVASHGGQIDRVCAAFVPHIDQLVVRNGVSDSAV 1269  
 AmpB RSVDAWYKFAELDGLGYGTFQPLSNIRADPSKGLAVQLALHTTROTVEGGESNYPLHPASLDGAVDLSLVASHGGQIDRVCAAFVPHIDQLVVRNGVSDSAV 1277  
 Sol1 AIALGSMKRLSAHAKLQVLQDKSEQVLDVGNLRCVITYTEVLPSTGADKEAFISPLRLSWKPDIRAMDEQVQRFPFPPTENVEKAYLFDKLERGLTYLVAEIHERY 1377  
 AmpB IIVARGERRGISAYLDLQMLKPGNGVLASDGLRCVFSSEAK....DORTFASPLRLSWKPDIRATLSNRDARHMFPPKANVERSLWGVNTVAEAAPEADVEKHLQVAPHA 1382  
 Sol1 AGQQQFSAPAHIDNLSVWRMRMKDKNKW..AEANSLTSSQGLIKELFAEVOGHISDVKIANKVFNNMEDILNERKTGLEVVIPDNLLHGMVEDSLMTGAVPOLV 1484  
 AmpB GKLEDDPKPSDDVGHFEFWIKRGGQNSHPLMEAREFVNGGELLEIDELVSGQAPVMEVKIAKLLHDNAADILYQRRTGMVILISEGLLTPLYESGLMTGIVPOLV 1490  
 Sol1 RFFDLGYANPNMRILEIGAGTGGATRIKILKTLIDPHIDIKRYODYTFDIDVSGLAQAREAFADFODMKYSVLDIQENFLEHGYEAVYQVVVAGECHLATPSIVKTL 1592  
 AmpB HVLGKIAHNSPNRLVLEIGAGTGGATRIAMNAFNPNIDIKARYDYTFDIDVSGLAQAREAFADFODMKYSVLDIQENFLEHGYEAVYQVVVAGECHLATPSIVKTL 1598  
 Sol1 NCRKLVKPGQRLVVENTRAVIGHLLVLGHLGSHYWDGIPDGRVESPFLLLEGWNASLNOTFAGAEVLDDYFARYTTARTIVSAYVEPAKVQGSQPNGTVHLVHGDN 1700  
 AmpB NCRKLVKPGQRLVVENTRAVIGHLLVLGHLGSHYWDGIPDGRVESPFLLLEGWNASLNOTFAGAEVLDDYFARYTTARTIVSAYVEPAKVQGSQPNGTVHLVHGDN 1705  
 Sol1 RPELLSRTEHELTERTGTEFKVISIGDVETHLPDNRSTVAFADSKSLVLNASENDLKSFKALIRKSNLVWVTFGGIWHGHDPASITTGLLRTLTSTENPASQFLSID 1807  
 AmpB PAPPLAQIISKELEKRGVVARVGTFFESSLESFTPESTRIVALFDCKHLLANAKEODLKTVOHLARNSTSLVALTSCGVVKGRNADGALISOLLRLVQENPASHYVSD 1813  
 Sol1 VSPDSD...FQEIERTITLDOELASD....RIAGESRDEYFVWGEDCLWVSRVLPDVALQDKLELSESPRAEMLPLDSGGVQAAETPGLLTSLYFKPYE 1906  
 AmpB MDADHFEVSNDDQDLARCLVDFEFELVGGTPVDGNEGNPNDOEFSWGGCLWVSRHVPDAGFHSQHGLDARSMPKELLPLGRGQPVRAETEPGQVNSCETTYNE 1920  
 Sol1 TWKSLPDDWQVKAAGVGLNWKDLTLAGRFDMNTFSSEYSGVAVGVGLNVTNVAAGDRVYVYGRGHFGNYVRAPANFAYRMLPGEDFKMATIPLVGMTAIYSFEC 2014  
 AmpB LLQPLQPGFVDVKAAGVGLNWKDLTLAGRFDMNTFSSEYSGVAVGVGLNVTNVAAGDRVYVYGRGHFGNYVRAPANFAYRMLPGEDFKMATIPLVGMTAIYSFEC 2028  
 Sol1 TQLKQGERLLIQSATGGLGSLAQAKAKAGAEIFATAGTOEKRRYLDIVVGISPASHVSSRDPADFAKLMEATDGKGFNVILSTSSBELLYSIKMLAPMGRIDVGR 2122  
 AmpB AHLKEQGSVLDQSGATDLGLIASCFAKAKAGADVATVQTPQEGASFVADDELGPASHVLIQAPSLADLRRAAQTTRAKAHEVISTATGELLSSFLKVLARLHGLIDVGG 2136  
 Sol1 IDVNSTSLALELFRKNATFTSPDLAVADADRALGPALMKAVNKRVAAGMGFLSSITTYDVSQDQALMAFSKGTHVSKLVVTFQNDPDLVKMVPAPFAHQAARNA 2230  
 AmpB ADPESLRQTILELPTNATYSVDPFIILSSDPVVGTELMKAIIDAYYRGLGIGIPKIIITAPDVSQSSALGDPS..SMIGKLVNSESFENESLVMITIPAAFTVKGDPDS 2242  
 Sol1 NYLITGGLGGLRSIVNFMARAGHFTVLSRSRKINS..EGBMLIDKLTSGTVVCEVSDSDSKDVARAVDDAAVVRPIKGIIVHAAVSODLSFDBKAIIEQWTSAL 2337  
 AmpB CVVVTAGLGLGGLIRWMGDRGARHMAVLSREISSVQAGELVESLASRDHLSHVCDVSDKQDQIRVIGKISATRPKGVVHAAVSYDLTFDQSTSRWNGDL 2350  
 Sol1 AAKVQGTKNLHEATKTHALDFFLMTTITIEFVALATQASAYTAANNFQDFYARWRQOGLPASTVSFQIRDVQHLSTNSTLALMARNKVMIDSEYNFRLLEPAFLN 2445  
 AmpB SAKVQGTKNLHEATKTHALDFFLMTTITIEFVALATQASAYTAANNFQDFYARWRQOGLPASTVSFQIRDVQHLSTNSTLALMARNKVMIDSEYNFRLLEPAFLN 2458  
 Sol1 NESALDPAASKPEYTRAVDDPLSVTVNVTGCDPATMATRKREAAENNGNTGNSPRWYTDARVSLIRAFDDAERYQASAGGGGDOGNERNAGVASRSEFGAEVK 2553  
 AmpB NKTAGE..TSPQWLQEEEDPLSVTVNVTGCDPATMATRKREAAENNGNTGNSPRWYTDARVSLIRAFDDAERYQASAGGGGDOGNERNAGVASRSEFGAEVK 2560  
 Sol1 ACPAERSRTVALVTDIVKTVQAQMLFVDSAGVDASRTVADYGVDSLSIAELRNWFFNVAFGADVSMLEMLDTATSMKILANKIVDGAAL 2642  
 AmpB EGADARASTVGLVGGAIKTAFAEMLFVDVESIDPAKSVADLGVDSLIAELRNWFFLQGLATNISMULDLPSTI..... 2634

**Figure S2.** Amino acid sequence alignment of AmpB with Sol1. The sequences are aligned using the program Clustal Omega and Jalview.

AmpC MTIQTNNGNSNGTMA SQPNKGHLNGTSTIQNNGGIQGESTSILSLAQNILDLTQDMTKYFQANNLAAPTALQSQDPPDT 80  
 Sol2 .....MALKSTNGTHAGPTASAASLASLANISEKAASLSTYLESQGHQAPSFPLPGCADPPET 58  
 AmpC PEYRRIHANLKTSLSDLSRLIDGPRKWLRAFCTGTGYDLGALQVALDFEFFQLVPAHGEIKLEDLAEKAGLDADRTGRVVR 160  
 Sol2 EEYLAHLTSLTSSLEDLQVLVDGPRRLSRPCTIGNDLALALQVAFDFGFFQLIRPEGSMDVETLAHKVGIADRTGRVVR 138  
 AmpC QLMTYRIFEEELRPRFISHSSTS LAMQQDDQLRCSVVHYSLDEMLKAAADCNVSLKANPYEAHQNNQNPFTVRHGVGIFEFYK 240  
 Sol2 QMLATHRIFVEPKPGFFAHTAASAVFHDDEELRCAGHYMLDECFAKATACSDCIKASPNDSDTHSPFNTYFGVPMFSYK 218  
 AmpC KDPEKARRFAKAMAGLRKMDRHLDYLLKDGFDWSAIQGTVVDCGGGNGHISKTLAELYFNLDVVEDSNADMLAESKESL 320  
 Sol2 QNPQFAARFAKAMAVDRQIA.....ELRDCFPWGDIKGTVVDCGGGSGHISMA LARNFKLDFIVQDDSEKMLAQRARN 293  
 AmpC PKDLDRGVKYLQHSFFDPQPVKDAAFILRQCTHNWADNDVVTIFKSFVPGLEGSGPDTPLLINDIIPPEPTWRHQR 400  
 Sol2 LSDIEGRISFMKHSFFHPQPIGGGAGAFFIRQCTHNWCDRDVVKILKSFVPGLENSAPGTPLLINDTLPVPGSKPLHEER 373  
 AmpC VVRQVDMVMLVNCQAKQRTKAEFEALLKEADSRYEIRNVFDNGPLSLLEVYLNRY\* 456  
 Sol2 ALRQMDMLMFVVLGAKQRTAKEFEALLKEADARYEIRRVHADGSMGLVEVHLNI\* 428

**Figure S3.** Amino acid sequence alignment of AmpC with Sol2. The sequences are aligned using the program Clustal Omega and Jalview.

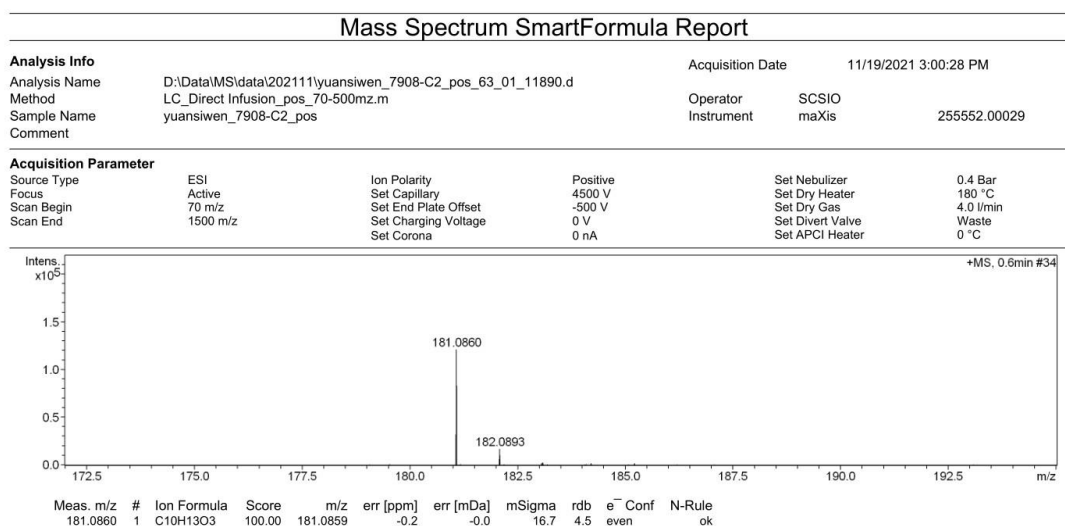

**Figure S4.** HRESIMS spectrum for amphichopyrone A (1)

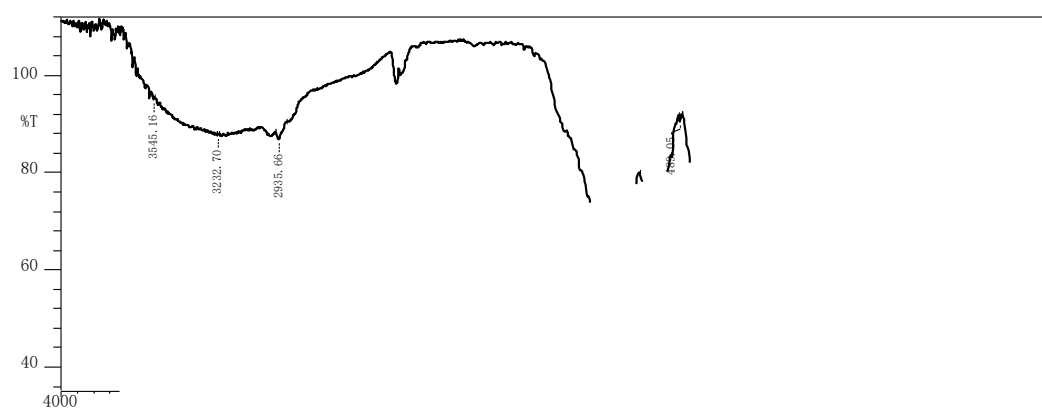

**Figure S5.** The IR spectrum of Amphichopyrone A (1)

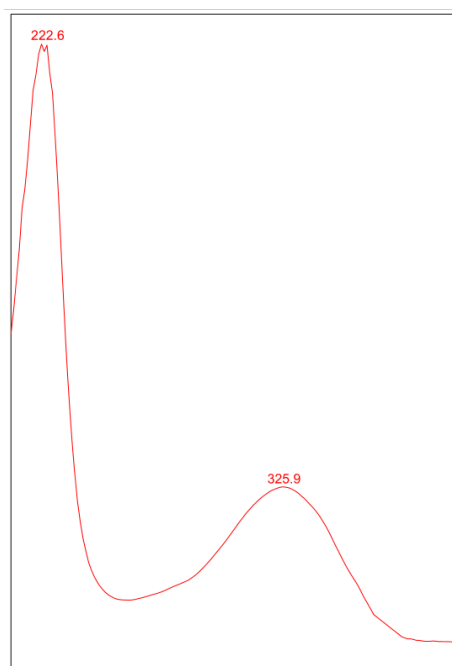

**Figure S6.** The UV spectrum of Amphichopyrone A (1)

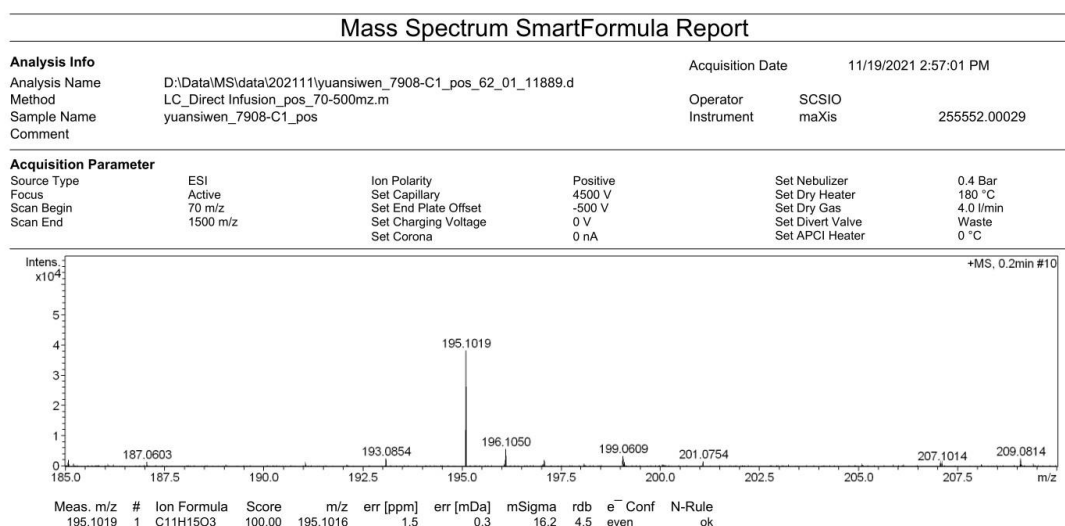

**Figure S7.** HRESIMS spectrum for amphichopyrone B (2)



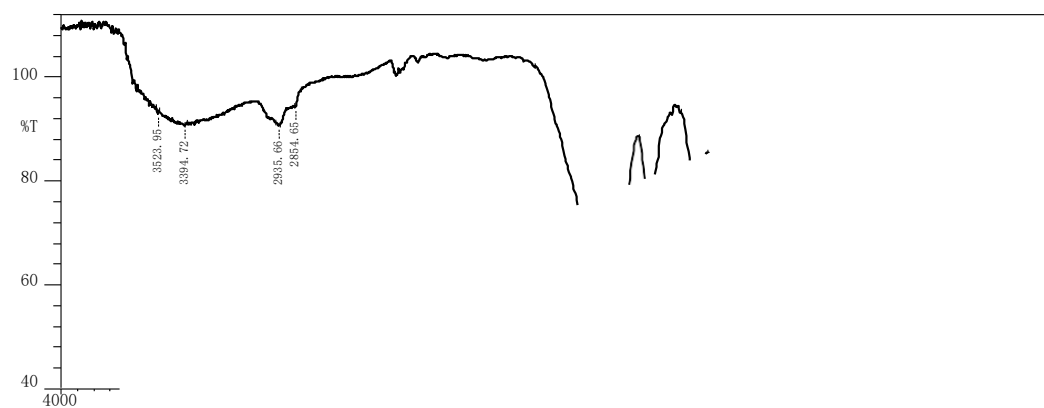

**Figure S8.** The IR spectrum of Amphichopyrone B (2)

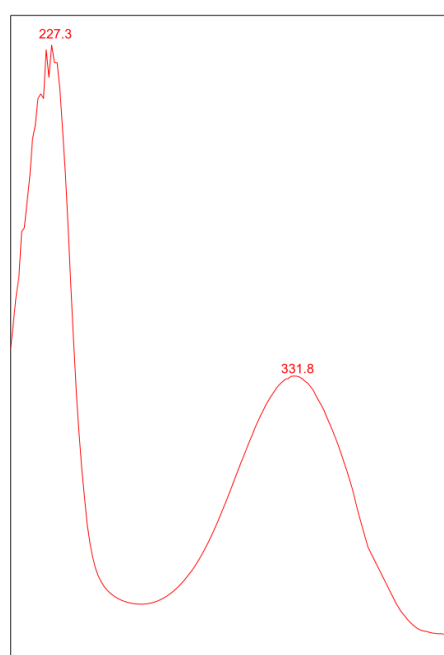

**Figure S9.** The UV spectrum of Amphichopyrone B (2)

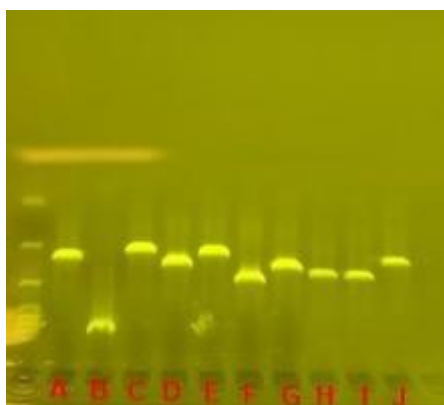

**Figure S10.** PCR analysis for the AO-*amp*ABCDEFGHII construct.

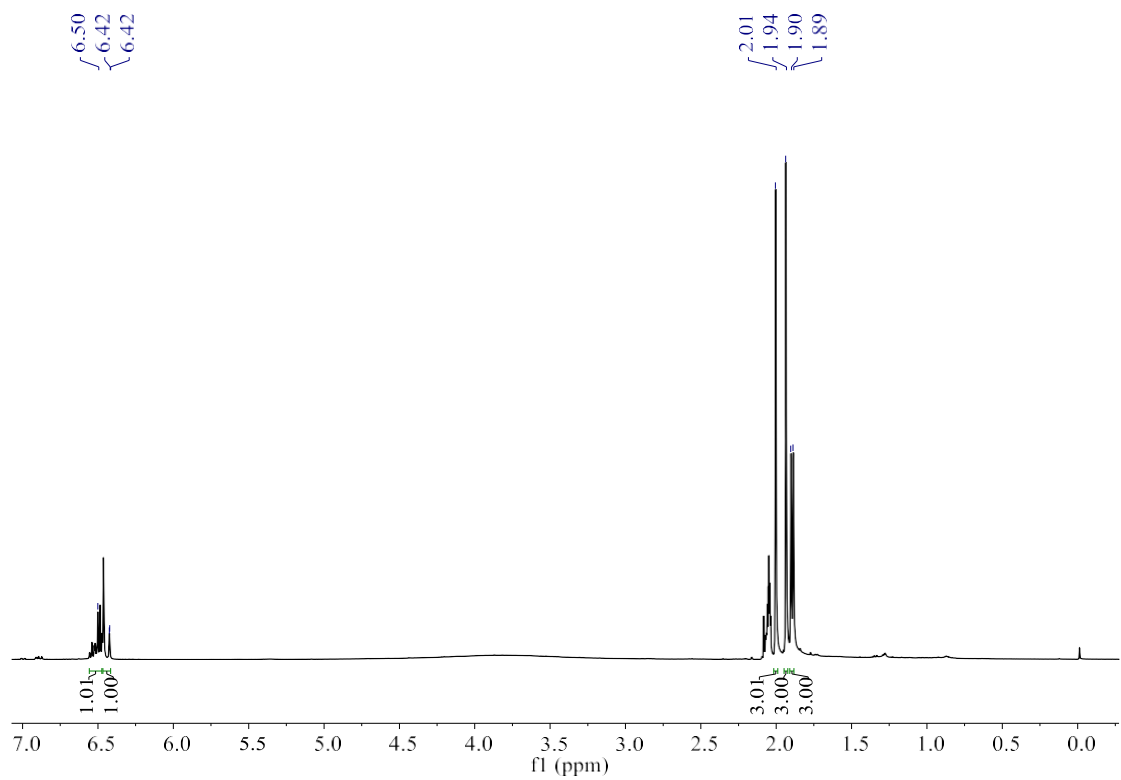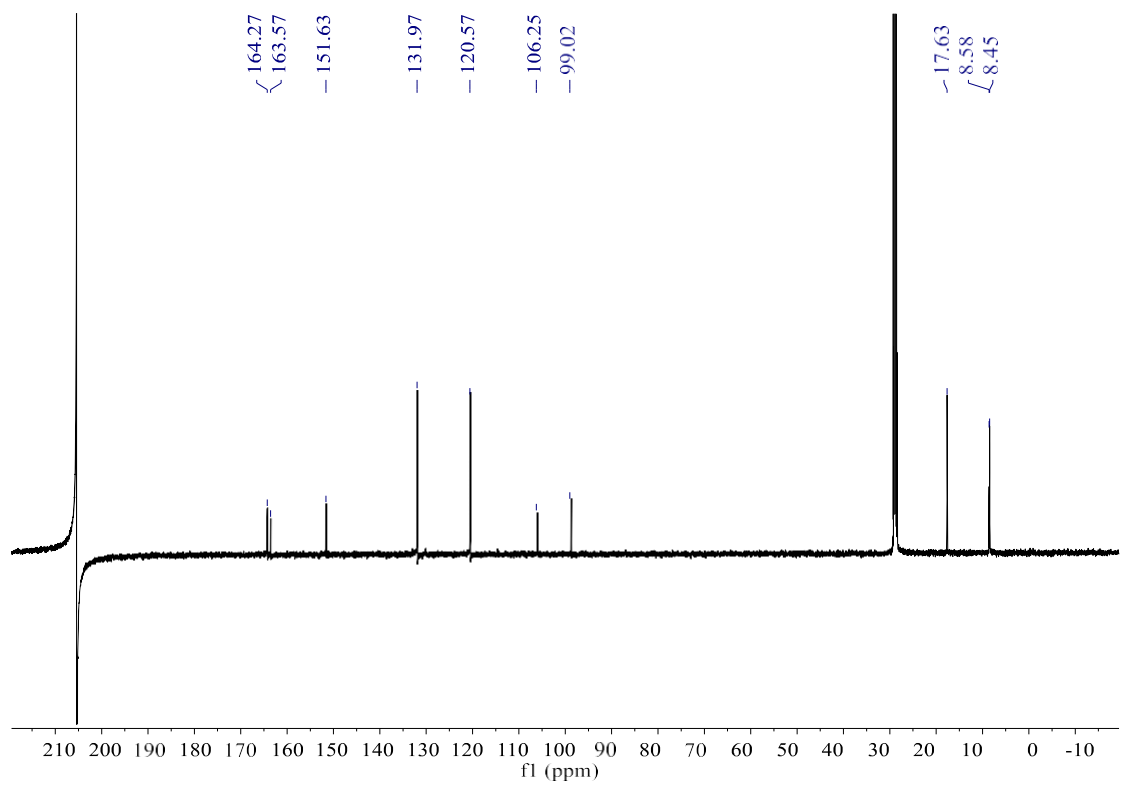

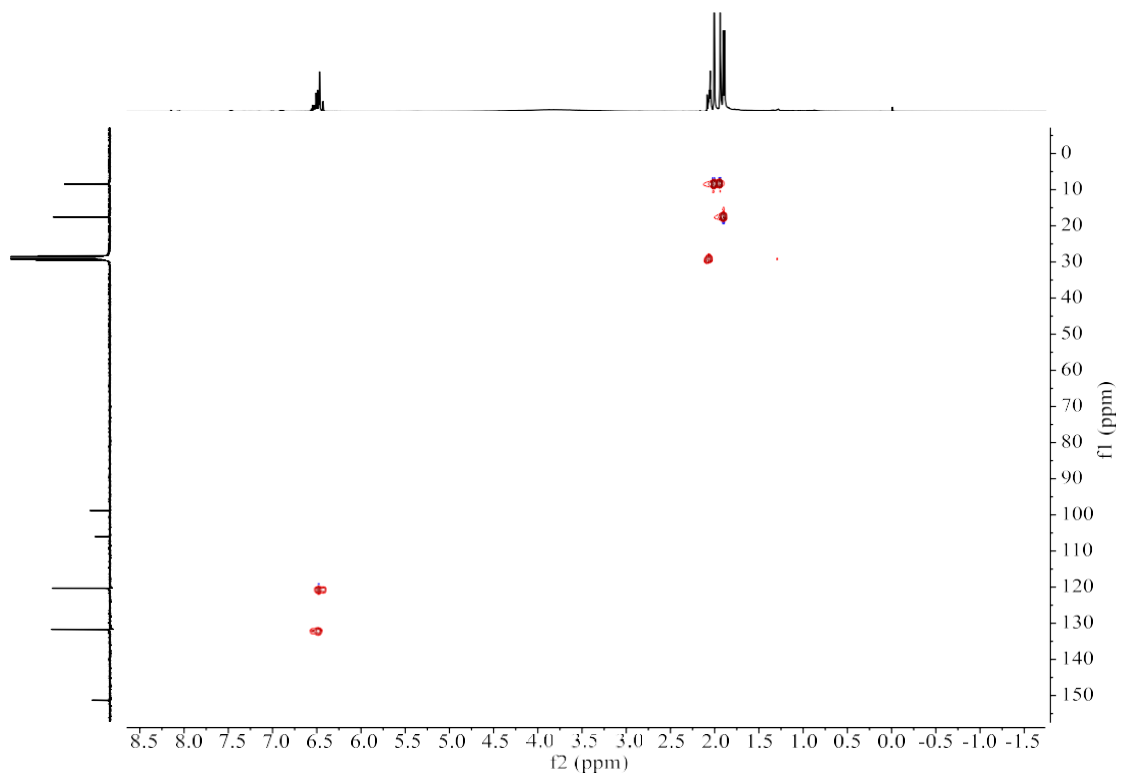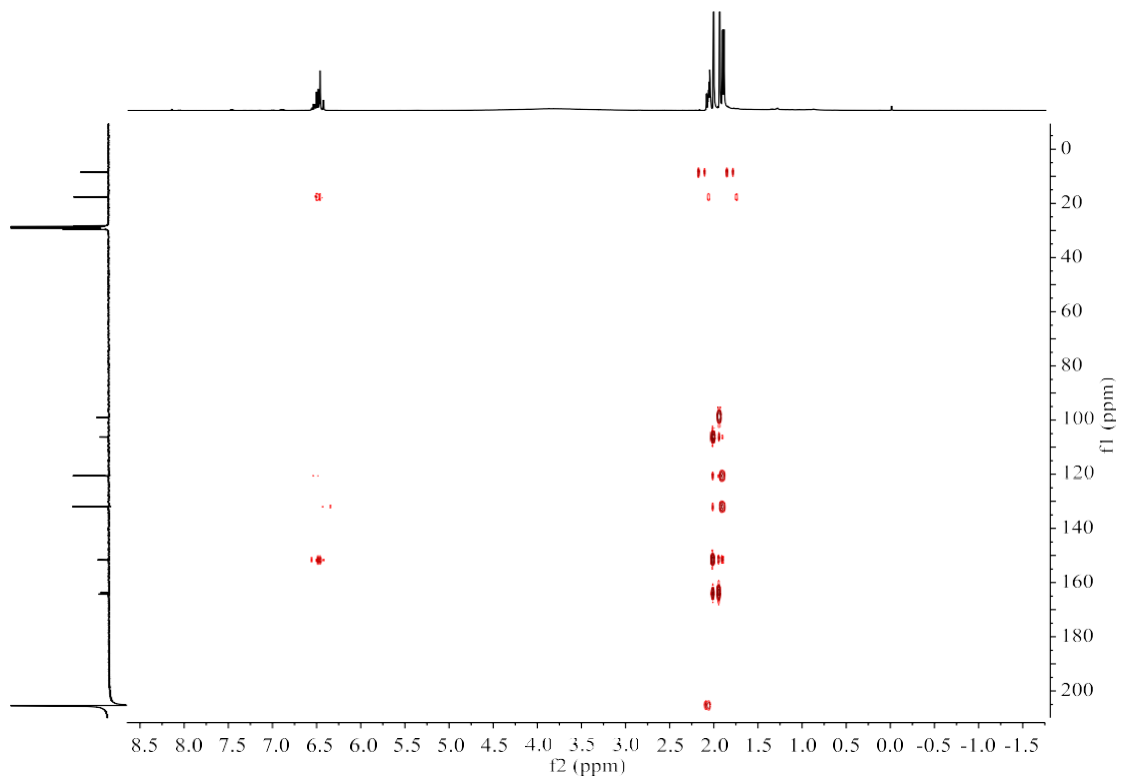

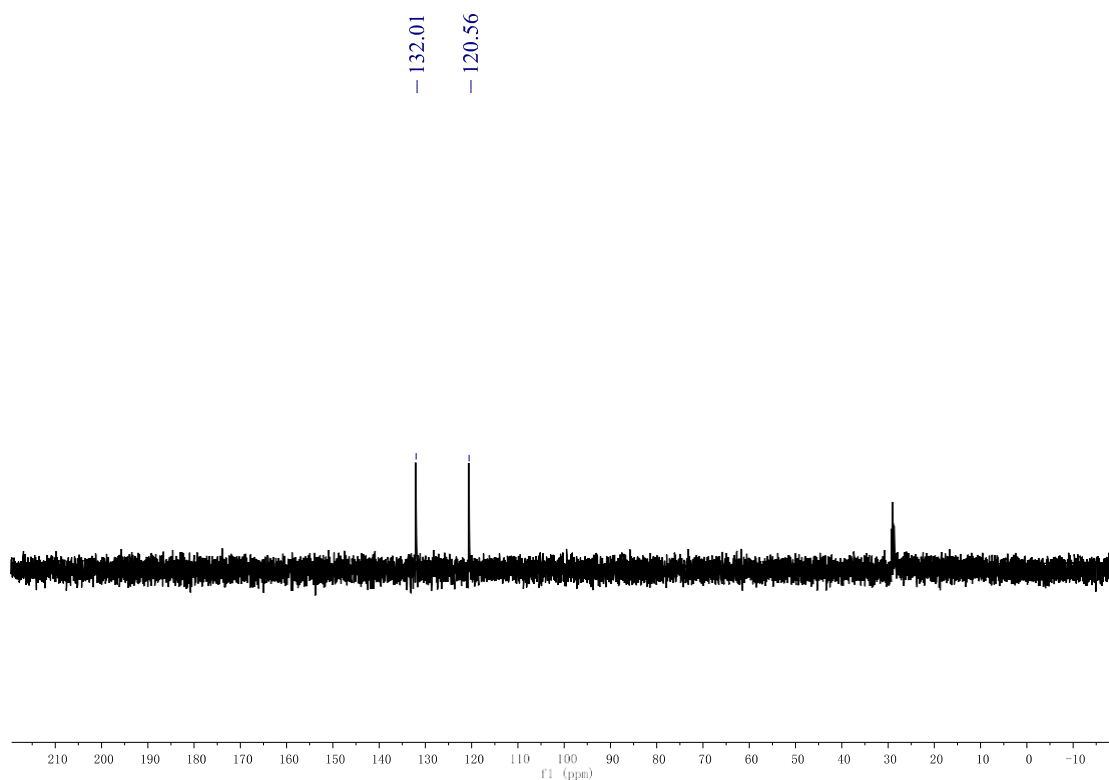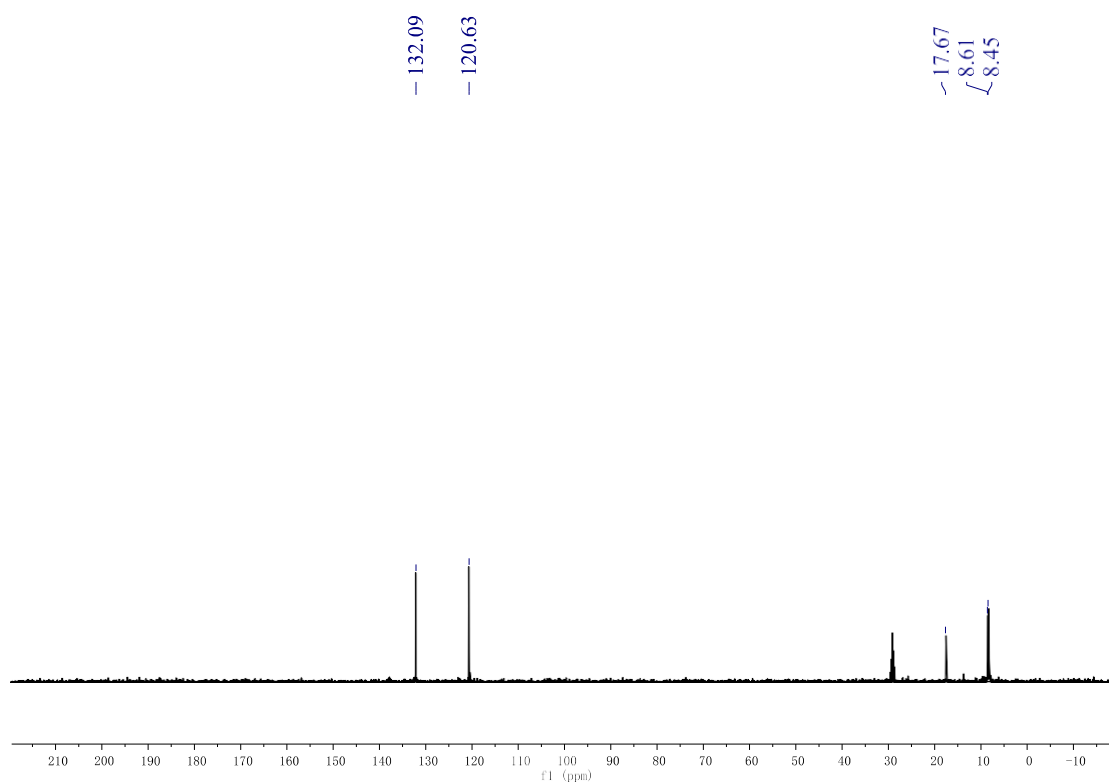

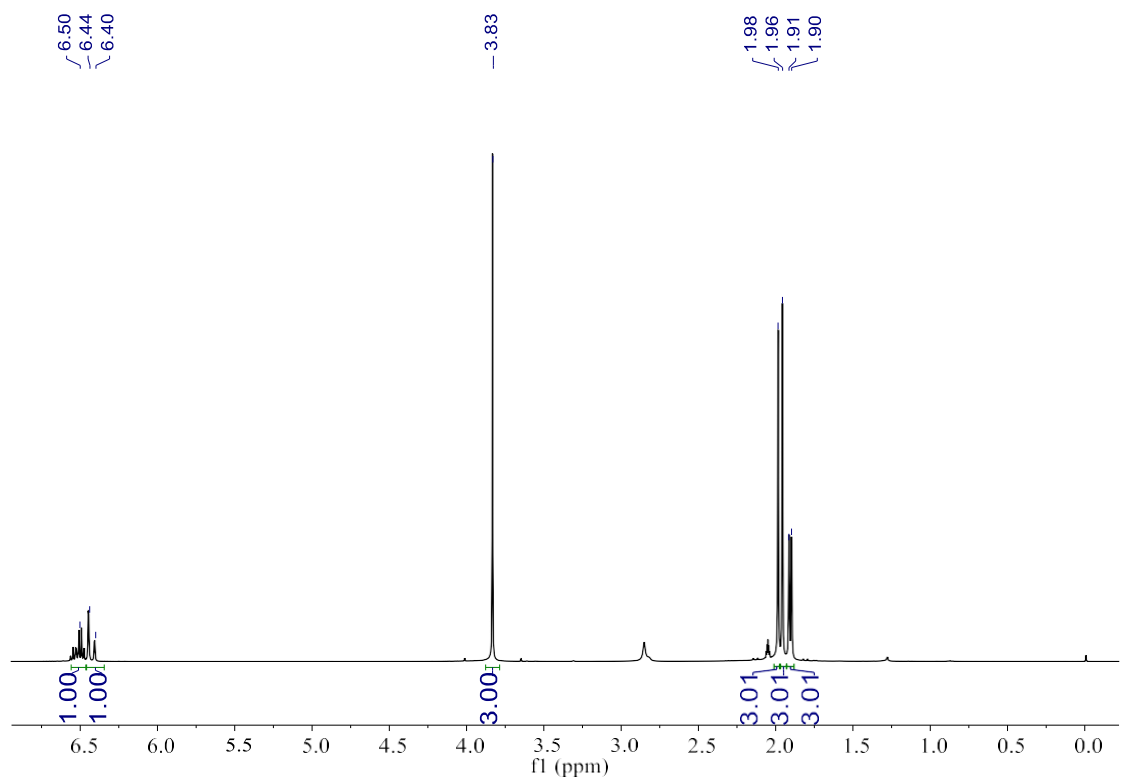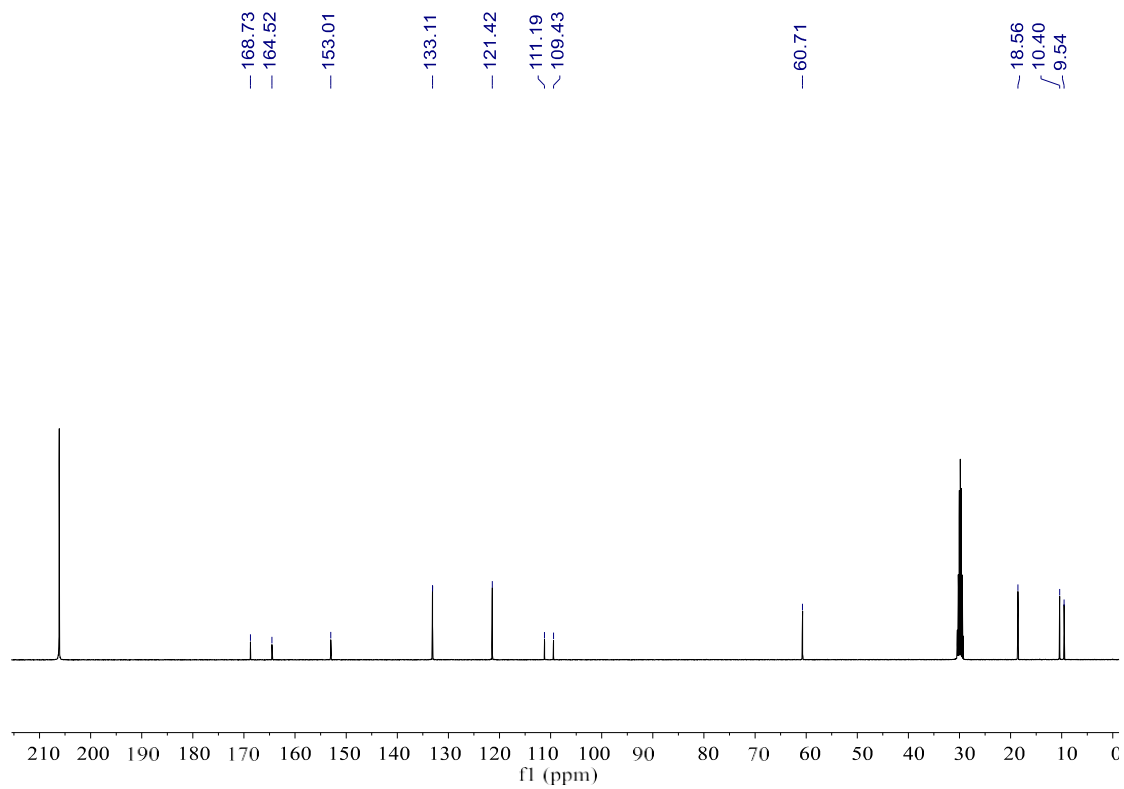

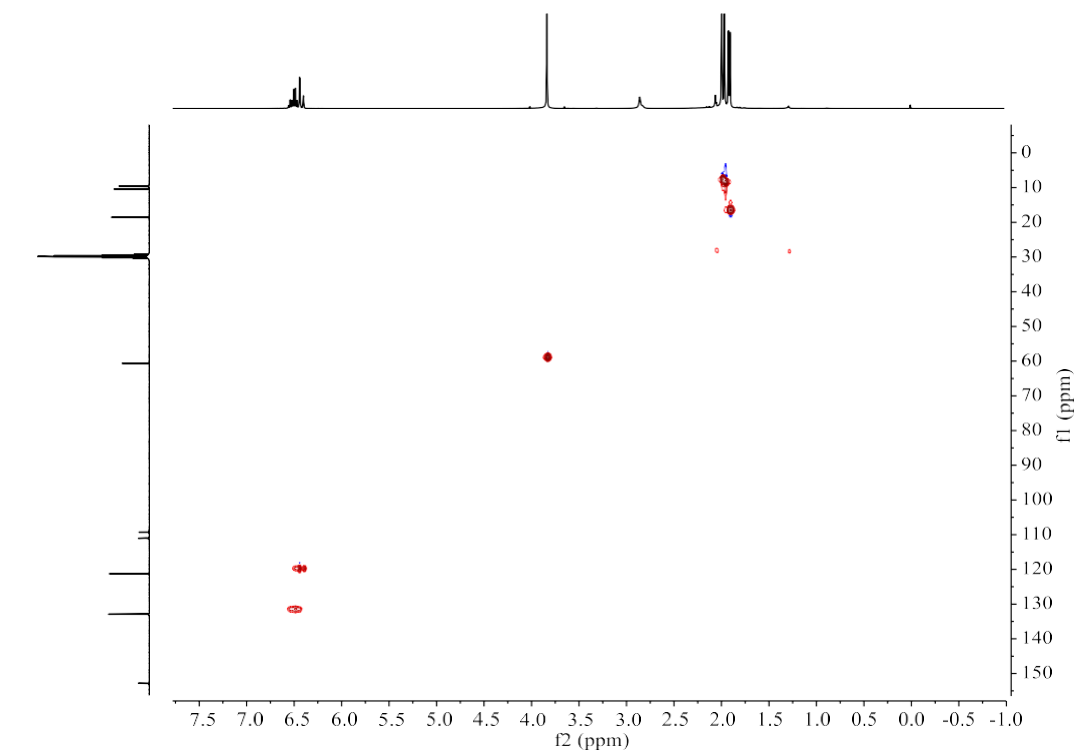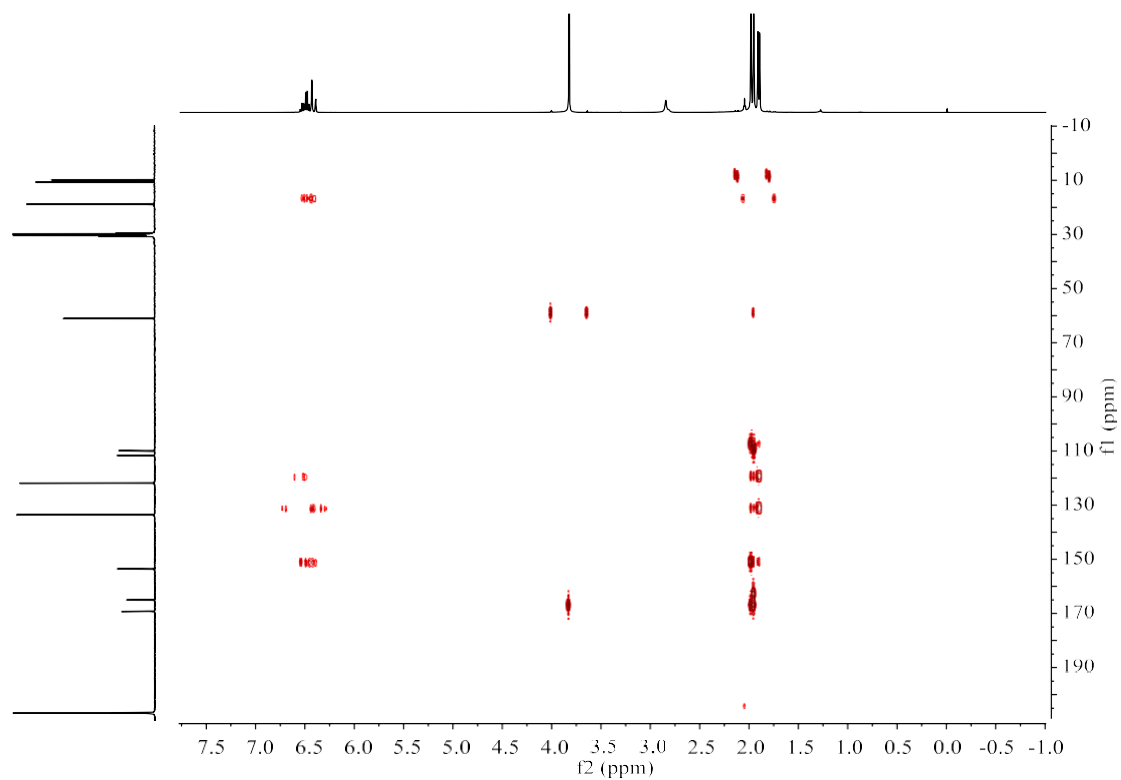

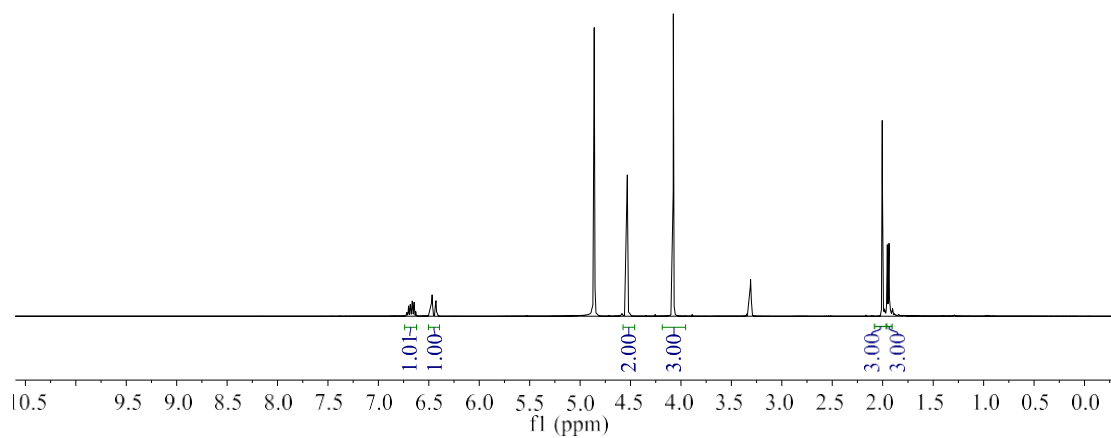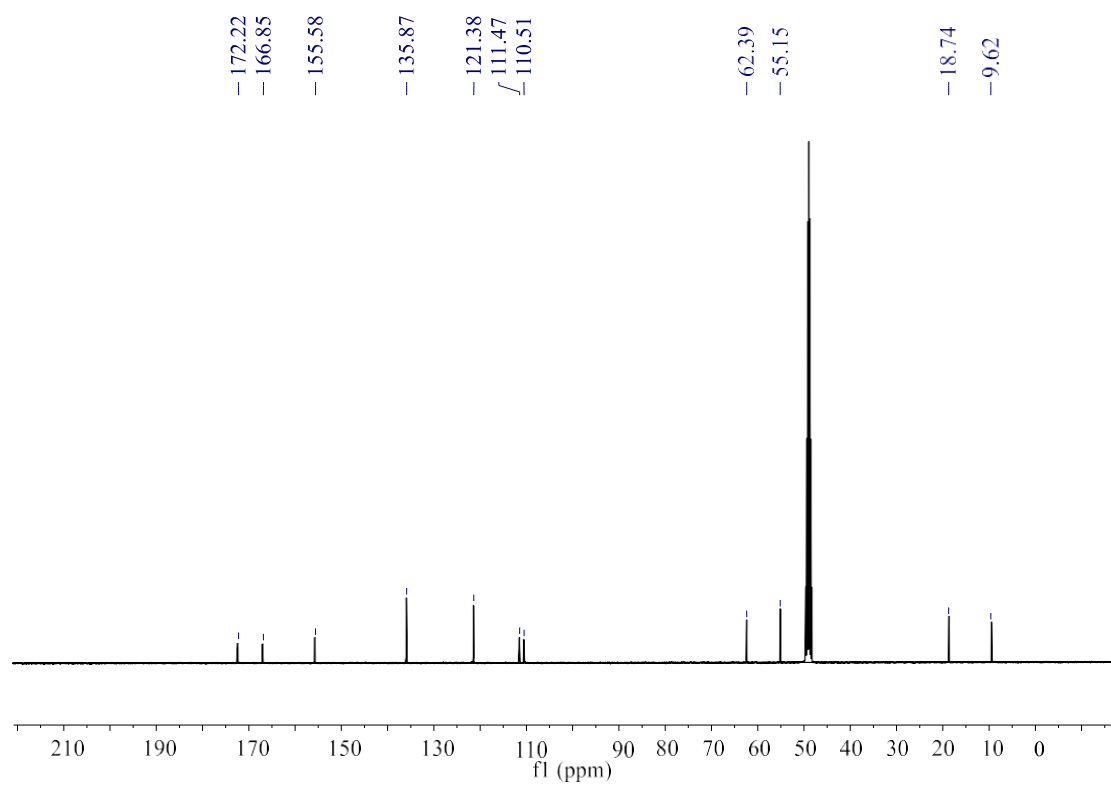

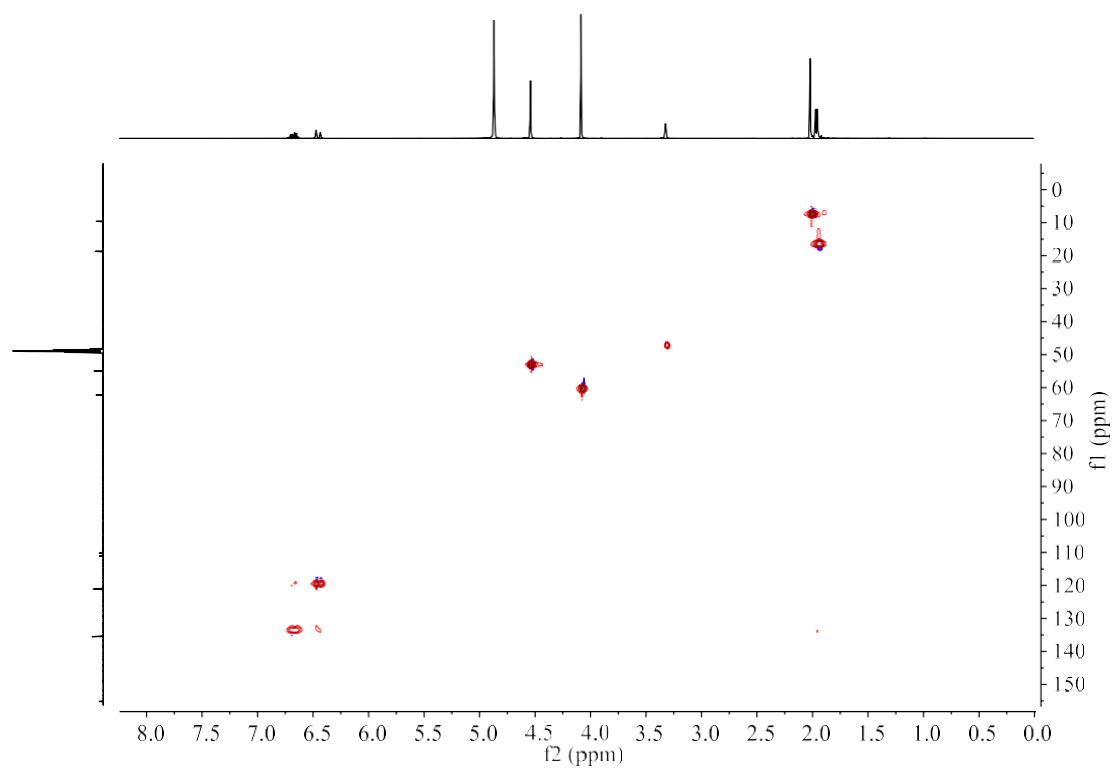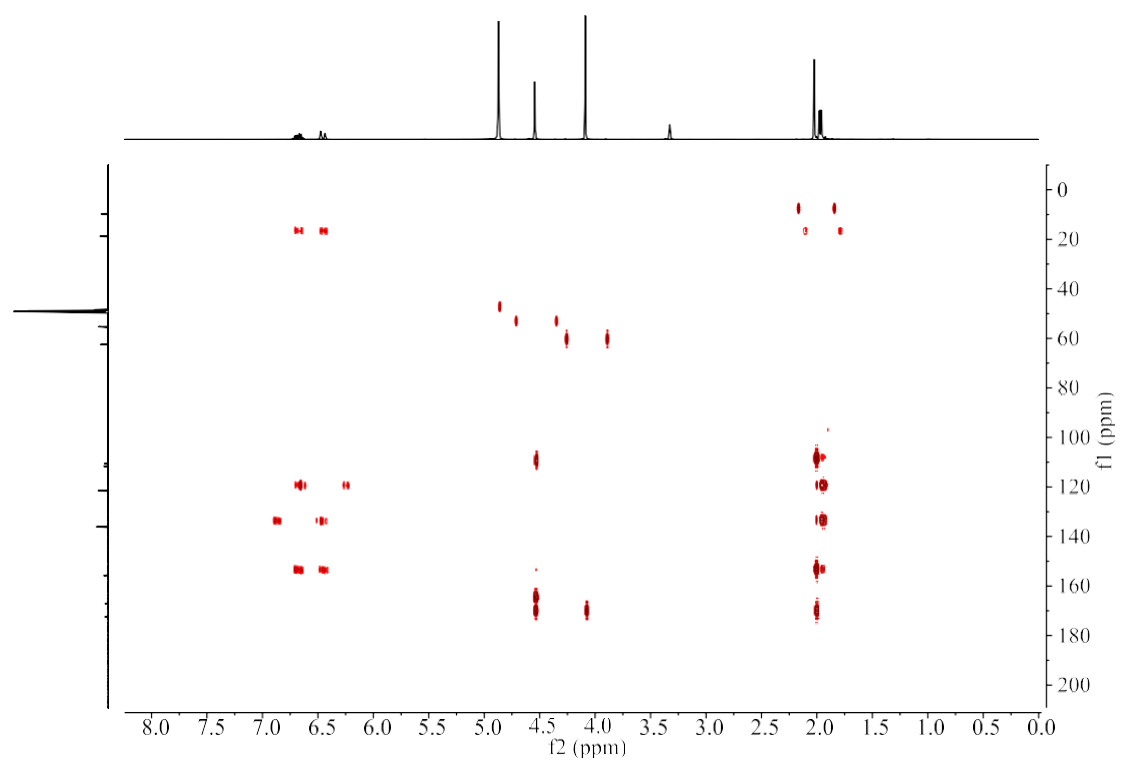

Supplement: s1 [file s1]
